# Supplementary material for: Optimization of the feeding rate of Anopheles farauti s.s. colony mosquitoes in direct membrane feeding assays
Source: PubMed Central journal article supplement (PMC8261992; doi:10.1186/s13071-021-04842-y), 2021-07-07

**Supplementary Table S1.** Flow chart of the feeding parameters that were tested progressively. The selected parameters are in bold and were used in the subsequent tests.

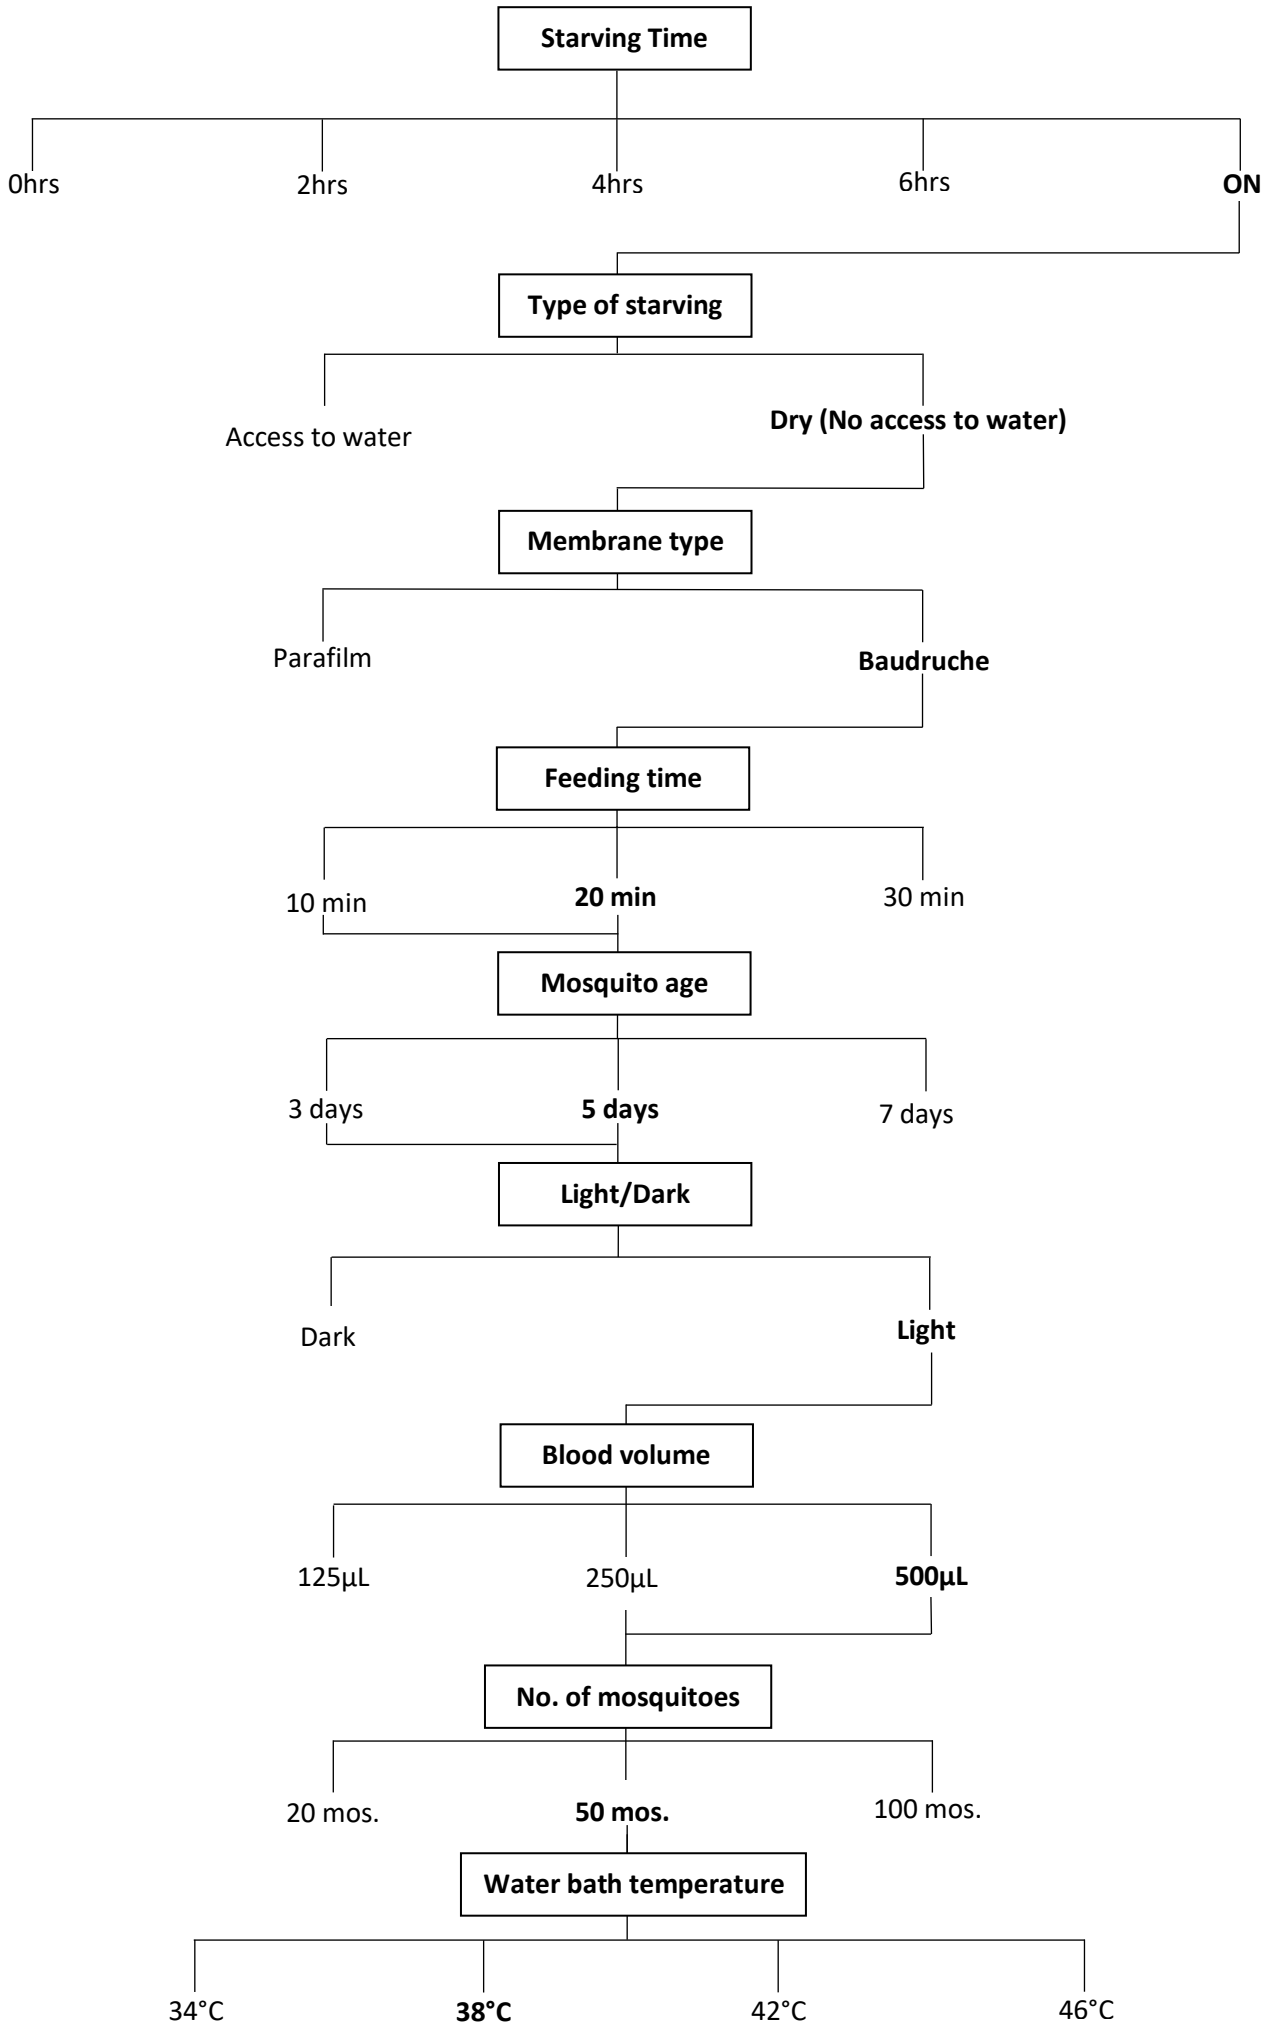

Supplement: 13071_2021_4842_MOESM1_ESM.pdf [file 13071_2021_4842_MOESM1_ESM.pdf]
